# Supplementary material for: Engineering of 3D NaxCoO2 nanostructures for enhanced capacitive deionization: performance and mechanism
Source: Royal Society of Chemistry journal article supplement (doi:10.1039/d0en01091j), 2021-01-01
Supplement: d0en01091j1.pdf [file d0en01091j1.pdf]

## **Engineering of 3D Na<sub>x</sub>CoO<sub>2</sub> Nanostructures for Enhanced Capacitive**

### **Deionization: Performance and Mechanism**

Wei Si,<sup>a b</sup> Zhenzhen Liu,<sup>a</sup> Zehao Zhang,<sup>b</sup> Wenxin Ji,<sup>a</sup> Haibo Li<sup>a b \*</sup>

a. State Key Laboratory of High-efficiency Utilization of coal and Green Chemical  
Engineering, Ningxia University, Yinchuan 750021, China

b. Ningxia Key Laboratory of Photovoltaic Materials, Ningxia University, Yinchuan,  
Ningxia, 750021, China

\*Corresponding author. Fax/Tel.: +86 0951 2062414; E-mail: [lihaibo@nxu.edu.cn](mailto:lihaibo@nxu.edu.cn)

(Haibo Li)

**Table S1.** The comparison on the pore texture of Na<sub>x</sub>CoO<sub>2</sub>.

| Sample                                  | S <sub>BET</sub> (m <sup>2</sup> g <sup>-1</sup> ) | V (cm <sup>3</sup> g <sup>-1</sup> ) | D <sub>avg</sub> (nm) |
|-----------------------------------------|----------------------------------------------------|--------------------------------------|-----------------------|
| Na <sub>0.2</sub> CoO <sub>2</sub> [22] | 3.832                                              | 0.048                                | 50.3                  |
| Na <sub>0.5</sub> CoO <sub>2</sub> [22] | 2.827                                              | 0.031                                | 43.571                |
| Na <sub>0.7</sub> CoO <sub>2</sub> [22] | 3.260                                              | 0.049                                | 59.934                |
| Na <sub>1.0</sub> CoO <sub>2</sub> [22] | 1.552                                              | 0.013                                | 33.202                |
| Na <sub>1.6</sub> CoO <sub>2</sub> [22] | 1.720                                              | 0.013                                | 30.261                |
| 3D Na <sub>0.6</sub> CoO <sub>2</sub>   | 4.232                                              | 0.026                                | 24.569                |

**Table S2.** The elemental ratio of Na<sub>x</sub>CoO<sub>2</sub> upon the desalination.

| Time (min) | Na    | Co     | O      |
|------------|-------|--------|--------|
| 0          | 7.29% | 23.10% | 69.61% |
| 5          | 4.67% | 32.64% | 62.69% |
| 60         | 6.28% | 30.35% | 63.37% |
| 90         | 3.30% | 31.68% | 65.02% |

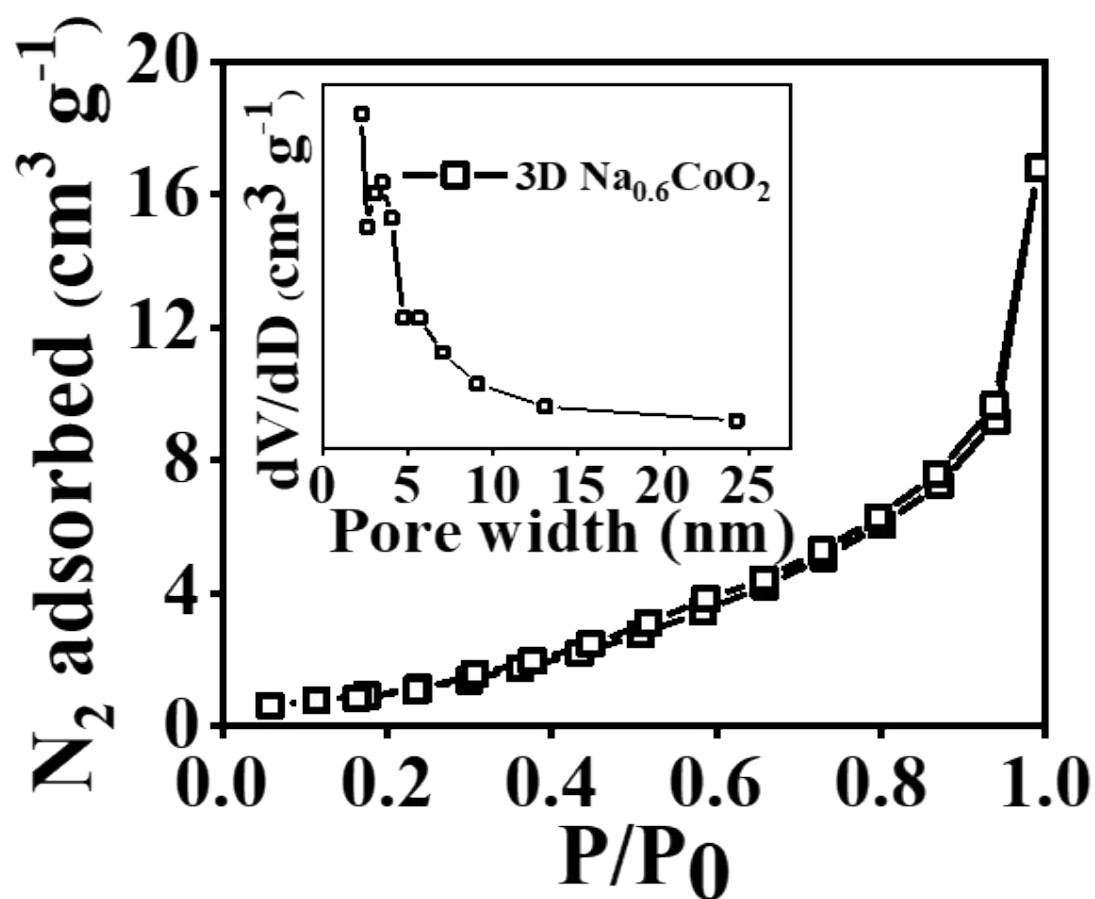

**Figure S1**  $N_2$  adsorption-desorption isotherm and pore size distribution of  $3D Na_{0.6}CoO_2$

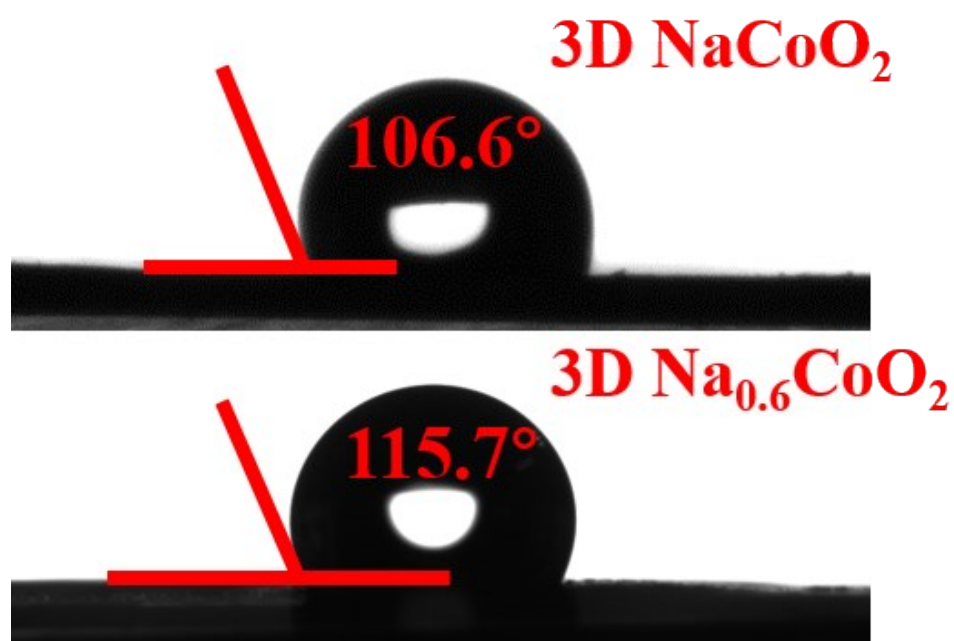

**Figure S2** contact angle image of  $3D NaCoO_2$  and  $3D Na_{0.6}CoO_2$ .

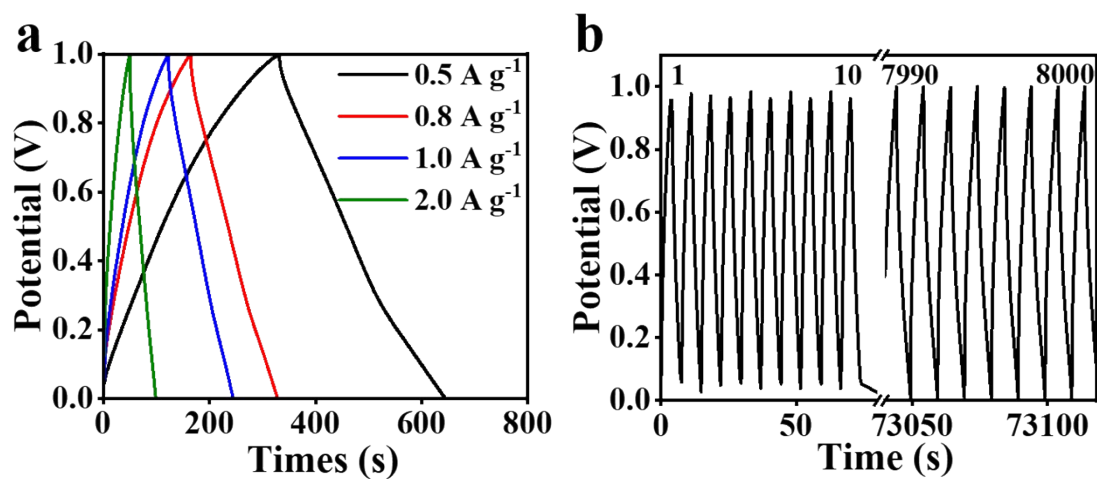

**Figure S3** (a) GCD under different current densities (0.5, 0.8, 1.0, 2.0 A g<sup>-1</sup>), (b) 8000 cycles GCD tests under 10 A g<sup>-1</sup> current density.

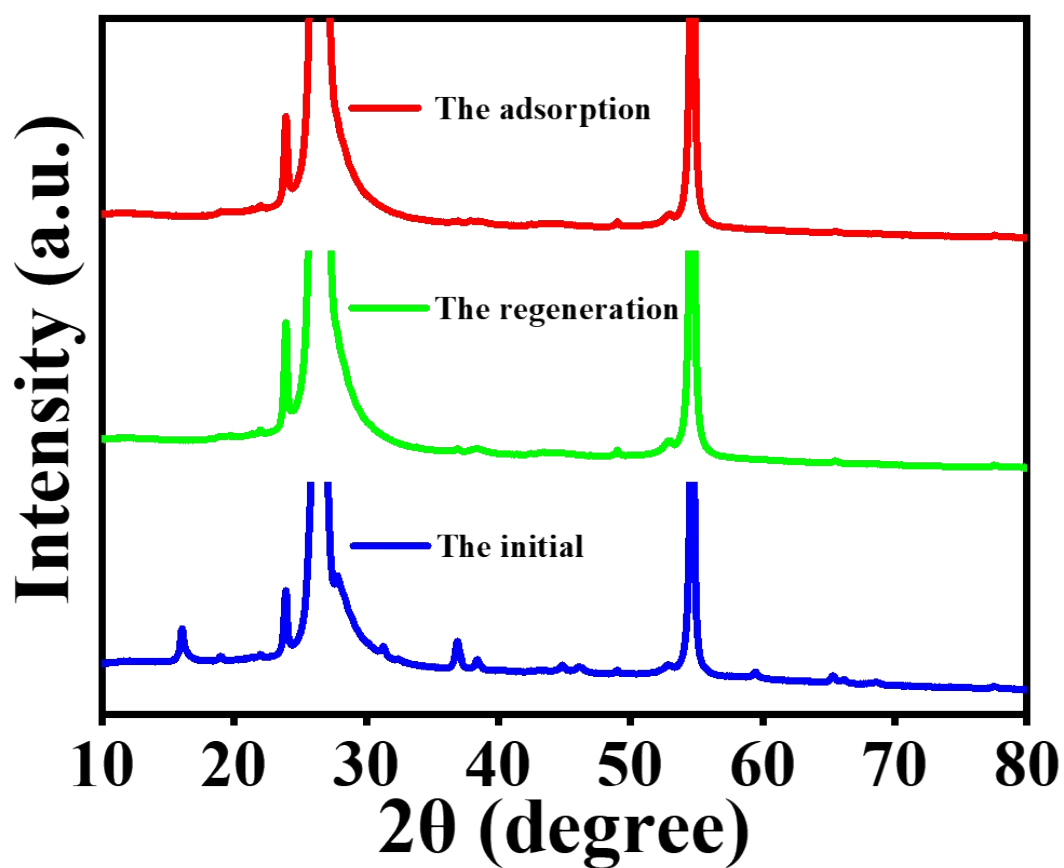

**Figure S4.** The XRD patterns of 3D Na<sub>0.6</sub>CoO<sub>2</sub> in different states.

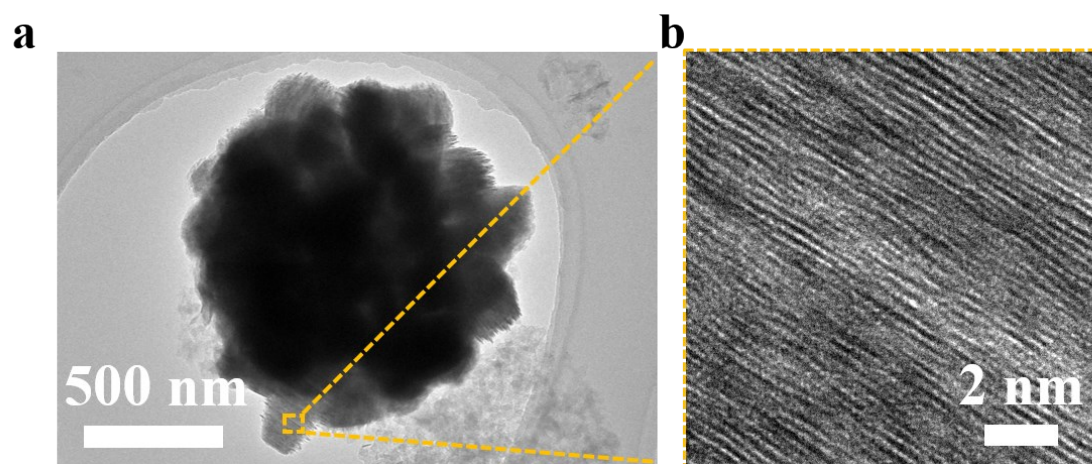

**Figure S5** The TEM images of 3D  $\text{Na}_{0.6}\text{CoO}_2$  at low (a) and high (b) magnification after the adsorption.
